# Supplementary material
Source: publisher figshare collection journal article supplement (https://asha.figshare.com/articles/dataset/_/9932312)
Supplement: Supplementary file 1 [file 1]

# A Comparison of the Storage-Only Deficit and Joint Mechanism Deficit Hypotheses of the Verbal Working Memory Storage Capacity Limitation of Children with Developmental Language Disorder

Supplemental Material

*May 1, 2019*

## Contents

|          |                                                            |           |
|----------|------------------------------------------------------------|-----------|
| <b>1</b> | <b>Preparation</b>                                         | <b>3</b>  |
| 1.1      | Load Packages . . . . .                                    | 3         |
| 1.2      | Import SPSS Dataset . . . . .                              | 3         |
| 1.3      | Prepare Dataset . . . . .                                  | 4         |
| <b>2</b> | <b>Exploratory Data Analysis</b>                           | <b>5</b>  |
| 2.1      | Descriptive Summary . . . . .                              | 5         |
| 2.2      | Visualization . . . . .                                    | 6         |
| 2.2.1    | Convert to Long Fromat . . . . .                           | 6         |
| 2.2.2    | Univariate Distributions . . . . .                         | 8         |
| 2.2.3    | Bivariate Associations . . . . .                           | 11        |
| <b>3</b> | <b>GLM - TD: Typically Developing Group</b>                | <b>15</b> |
| 3.1      | Fit Nested Models . . . . .                                | 15        |
| 3.2      | Parameter Estimates . . . . .                              | 16        |
| 3.3      | Comparisons of Nested Model . . . . .                      | 17        |
| 3.4      | Partial Correlations . . . . .                             | 17        |
| <b>4</b> | <b>GLM - DLD: Developmental Language Disorder Group</b>    | <b>18</b> |
| 4.1      | Fit Nested Models . . . . .                                | 18        |
| 4.2      | Parameter Estimates . . . . .                              | 19        |
| 4.3      | Comparisons of Nested Model . . . . .                      | 20        |
| 4.4      | Partial Correlations . . . . .                             | 20        |
| <b>5</b> | <b>GLM - Full Sample</b>                                   | <b>21</b> |
| 5.1      | Fit Nested Models - a single two-way interaction . . . . . | 21        |
| 5.2      | Parameter Estimates . . . . .                              | 23        |
| 5.2.1    | Simple Slopes . . . . .                                    | 25        |
| 5.3      | Interpretation . . . . .                                   | 25        |
| 5.3.1    | Visualization . . . . .                                    | 26        |

## List of Tables

|   |                                                                                                                       |    |
|---|-----------------------------------------------------------------------------------------------------------------------|----|
| 1 | Descriptive Summary of Measures by Group . . . . .                                                                    | 5  |
| 2 | GLM Parameter Estimates: Typically Developing Group. Estimates are standardized betas. .                              | 16 |
| 3 | GLM Parameter Estimates: Developmental Language Disorder Group. Estimates are standardized betas. . . . .             | 19 |
| 4 | GLM Parameter Estimates: Include a Single Two-way Interaction with Group, Estimates are unstandardized betas. . . . . | 23 |
| 5 | GLM Parameter Estimates: Include a Second Two-way Interaction with Group. Estimates are unstandardized betas. . . . . | 24 |
| 6 | Extremes of Long Term Memory Scores, by Group . . . . .                                                               | 26 |

## List of Figures

|   |                                                                                                                 |    |
|---|-----------------------------------------------------------------------------------------------------------------|----|
| 1 | Univariate Distribution of Each Measure, within Each Group, Histograms . . . . .                                | 8  |
| 2 | Univariate Distribution of Each Measure, within Each Group, Density Plots . . . . .                             | 9  |
| 3 | Univariate Distribution of Each Measure, within Each Group, Side-by-Side Boxplots . . . . .                     | 10 |
| 4 | Bivariate Correlation Between All Pairs of Measures, by Group . . . . .                                         | 12 |
| 5 | Eight Independent Simple Linear Regression Between Each Predictor and Verbal Working Memory, by Group . . . . . | 13 |
| 6 | Eight Independent Simple Linear Regressions Between Each Predictor and Verbal Working Memory . . . . .          | 14 |
| 7 | GLM Interaction Plot. Error bands display 95 percent confidence interval for the mean. . . .                    | 27 |

# 1 Preparation

## 1.1 Load Packages

```
library(tidyverse) # generally handy bits
library(haven)     # work with SPSS files
library(GGally)    # nice pairs plots
library(furniture) # descriptive tables
library(texreg)    # regression tables
library(lmSupport) # compare linear models
library(reghelper) # helper functions for regression
library(rsq)       # R-sq and partial correlations
library(effects)   # marginal effects for plotting
library(pander)    # formating genderal tables
```

## 1.2 Import SPSS Dataset

This dataset was attached to an email from Jim Montgomery 4-30-19 after our conference call with Ron Gillam.

```
data_spss <- haven::read_spss("Master9_Mtch_117x2_v13_with PSs_1-1-18.sav")
```

```
names(data_spss)
```

|                            |                        |                     |
|----------------------------|------------------------|---------------------|
| [1] "id"                   | "group"                | "SLI"               |
| [4] "TD"                   | "Propensity_Score"     | "Subject_Match"     |
| [7] "at_mo_at_test"        | "age7y_9y3"            | "age9y4_plus"       |
| [10] "age_group"           | "sex"                  | "mom_educ_ColDeg"   |
| [13] "income_less30k"      | "leiter_fg_RS"         | "leiter_fc_RS"      |
| [16] "leiter_so_RS"        | "leiter_rp_RS"         | "IQ_Total_RS"       |
| [19] "leiter_comp"         | "crevtrec_rs"          | "crevtexp_rs"       |
| [22] "celf_cfd_rs"         | "celf_rs_rs"           | "tnl_total_rec_rs"  |
| [25] "tnl_total_exp_rs"    | "tnl_total_rs"         | "crevtrec_SS"       |
| [28] "crevtexp_SS"         | "celf_cfd_SS"          | "celf_rs_SS"        |
| [31] "casl_antonyms_SS"    | "casl_antonyms_RS"     | "tnl_total_rec_SS"  |
| [34] "tnl_total_exp_SS"    | "composite_z_score"    | "digitspan"         |
| [37] "dstrialscor"         | "Dollaghan_PPC"        | "hl_countacctot"    |
| [40] "Wmspan"              | "wmtrialsor"           | "gor_d"             |
| [43] "gor_Pr_imputd"       | "gor_Br"               | "as_overall_acc"    |
| [46] "as_SwitchTrials_acc" | "VAR00156"             | "svo_acc"           |
| [49] "sr_acc"              | "pas_acc"              | "or_acc"            |
| [52] "CanonicalAcc"        | "NonCanonicalAcc"      | "TotSyntaxCompAcc"  |
| [55] "VAR00149"            | "zSV0"                 | "zSR"               |
| [58] "zpas"                | "zOR"                  | "ZCanonicalAcc"     |
| [61] "ZNonCanonicalAcc"    | "ZTotSyntaxCompAcc"    | "VAR00002"          |
| [64] "Zcasl_antonyms_RS"   | "Ztnl_total_rec_rs"    | "Ztnl_total_exp_rs" |
| [67] "Zdigitspan"          | "Zdstrialscor"         | "ZDollaghan_PPC"    |
| [70] "Zhl_countacctot"     | "ZWmspan"              | "ZWmtrialsor"       |
| [73] "Zgor_d"              | "Zgor_Pr_imputd"       | "Zgor_Br"           |
| [76] "Zas_overall_acc"     | "Zas_SwitchTrials_acc" | "VAR00169"          |
| [79] "zWMcomp"             | "zCAcomp"              | "zLTMcomp"          |

### 1.3 Prepare Dataset

Outcome:

- `wmtrialscor` - Working Memory capacity

Predictors:

- `dstrialscor` - Verbal Short-Term Storage
- `gor_Pr_imputd` - Sustained Attention
- `as_SwitchTrials_acc` - Attention Switching
- `casl_antonyms_RS` - Long-Term Memory
- `group` - Group
  - **SLI** Language Impaired Group, aka DLD Group
  - **TD** Typically Developing Group

```
data_model <- data_spss %>%
  dplyr::mutate(id = factor(id)) %>%
  dplyr::mutate(group = factor(group,
                                levels = c("TD", "SLI"),
                                labels = c("TD", "DLD"))) %>%
  dplyr::mutate_at(vars(wmtrialscor,
                        dstrialscor,
                        gor_Pr_imputd,
                        as_SwitchTrials_acc,
                        casl_antonyms_RS),
                  as.numeric) %>%
  dplyr::select(id,
                group,
                wmtrialscor,
                dstrialscor,
                gor_Pr_imputd,
                as_SwitchTrials_acc,
                casl_antonyms_RS)

head(data_model)
```

```
# A tibble: 6 x 7
  id   group wmtrialscor dstrialscor gor_Pr_imputd as_SwitchTrials~
<fct> <fct>   <dbl>       <dbl>       <dbl>         <dbl>
1 100   DLD         5         10         0.380         0.739
2 102   DLD         7         13         0.929         1
3 104   DLD         8          9         0.786         0.913
4 105   TD          8          8         0.853         0.870
5 106   DLD        10          9         0.903         0.957
6 107   DLD         7          9         0.857         0.818
# ... with 1 more variable: casl_antonyms_RS <dbl>
```

## 2 Exploratory Data Analysis

### 2.1 Descriptive Summary

```
data_model %>%
  dplyr::group_by(group) %>%
  furniture::table1("Verbal Short-Term Storage" = dstrialscor,
                    "Sustained Attention"      = gor_Pr_imputd,
                    "Attention Switching"      = as_SwitchTrials_acc,
                    "Long-Term Memory"         = casl_antonyms_RS,
                    "Verbal Working Memory"    = wmtrialscor,
                    total = TRUE,
                    test = TRUE,
                    caption = "Descriptive Summary of Measures by Group",
                    output = "latex2")
```

Table 1: Descriptive Summary of Measures by Group

|                           | group            |               |                | P-Value |
|---------------------------|------------------|---------------|----------------|---------|
|                           | Total<br>n = 234 | TD<br>n = 117 | DLD<br>n = 117 |         |
| Verbal Short-Term Storage | 9.9 (2.8)        | 11.1 (3.0)    | 8.7 (2.0)      | <.001   |
| Sustained Attention       | 0.8 (0.2)        | 0.8 (0.1)     | 0.8 (0.2)      | 0.018   |
| Attention Switching       | 0.8 (0.1)        | 0.9 (0.1)     | 0.8 (0.1)      | <.001   |
| Long-Term Memory          | 27.3 (7.5)       | 31.4 (6.5)    | 23.1 (6.1)     | <.001   |
| Verbal Working Memory     | 6.5 (3.5)        | 8.1 (3.4)     | 4.8 (2.8)      | <.001   |

## 2.2 Visualization

### 2.2.1 Convert to Long Fromat

```
data_long <- data_model %>%
  tidyr::gather(key = measure,
                value = score,
                -id, -group, -wmtrialscor) %>%
  dplyr::mutate(measure = case_when(measure == "dstrialscor" ~ 1,
                                   measure == "gor_Pr_imputd" ~ 2,
                                   measure == "as_SwitchTrials_acc" ~ 3,
                                   measure == "casl_antonyms_RS" ~ 4)) %>%

  dplyr::mutate(measure = factor(measure,
                                levels = 1:4,
                                labels = c("Verbal\nShort-Term Storage",
                                             "Sustained\nAttention",
                                             "Attention\nSwitching",
                                             "Long-Term\nMemory"))) %>%

  dplyr::arrange(id, measure)

head(data_long, n = 9)
```

```
# A tibble: 9 x 5
  id   group wmtrialscor measure          score
<fct> <fct>    <dbl> <fct>          <dbl>
1 100   DLD        5 "Verbal\nShort-Term Storage" 10
2 100   DLD        5 "Sustained\nAttention"      0.380
3 100   DLD        5 "Attention\nSwitching"      0.739
4 100   DLD        5 "Long-Term\nMemory"        20.6
5 102   DLD        7 "Verbal\nShort-Term Storage" 13
6 102   DLD        7 "Sustained\nAttention"      0.929
7 102   DLD        7 "Attention\nSwitching"      1
8 102   DLD        7 "Long-Term\nMemory"        24.9
9 104   DLD        8 "Verbal\nShort-Term Storage" 9
```

```
data_superlong <- data_model %>%
  tidyr::gather(key = measure,
                value = score,
                -id, -group) %>%
  dplyr::mutate(measure = case_when(measure == "dstrialscor" ~ 1,
                                   measure == "gor_Pr_imputd" ~ 2,
                                   measure == "as_SwitchTrials_acc" ~ 3,
                                   measure == "casl_antonyms_RS" ~ 4,
                                   measure == "wmtrialscor" ~ 5)) %>%

  dplyr::mutate(measure = factor(measure,
                                levels = 1:5,
                                labels = c("Verbal\nShort-Term Storage",
                                             "Sustained\nAttention",
                                             "Attention\nSwitching",
                                             "Long-Term\nMemory",
                                             "Verbal\nWorking Memory"))) %>%

  dplyr::arrange(id, measure)

head(data_superlong, n = 9)
```

```
# A tibble: 9 x 4
  id   group measure          score
<fct> <fct> <fct>          <dbl>
1 100   DLD  "Verbal\nShort-Term Storage" 10
2 100   DLD  "Sustained\nAttention"       0.380
3 100   DLD  "Attention\nSwitching"       0.739
4 100   DLD  "Long-Term\nMemory"         20.6
5 100   DLD  "Verbal\nWorking Memory"      5
6 102   DLD  "Verbal\nShort-Term Storage" 13
7 102   DLD  "Sustained\nAttention"       0.929
8 102   DLD  "Attention\nSwitching"       1
9 102   DLD  "Long-Term\nMemory"         24.9
```

## 2.2.2 Univariate Distributions

```
data_superlong %>%
  ggplot(aes(score,
              fill = group)) +
  geom_histogram(bins = 12) +
  theme_bw() +
  facet_grid(group ~ measure, scale = "free") +
  theme(legend.position = "bottom")
```

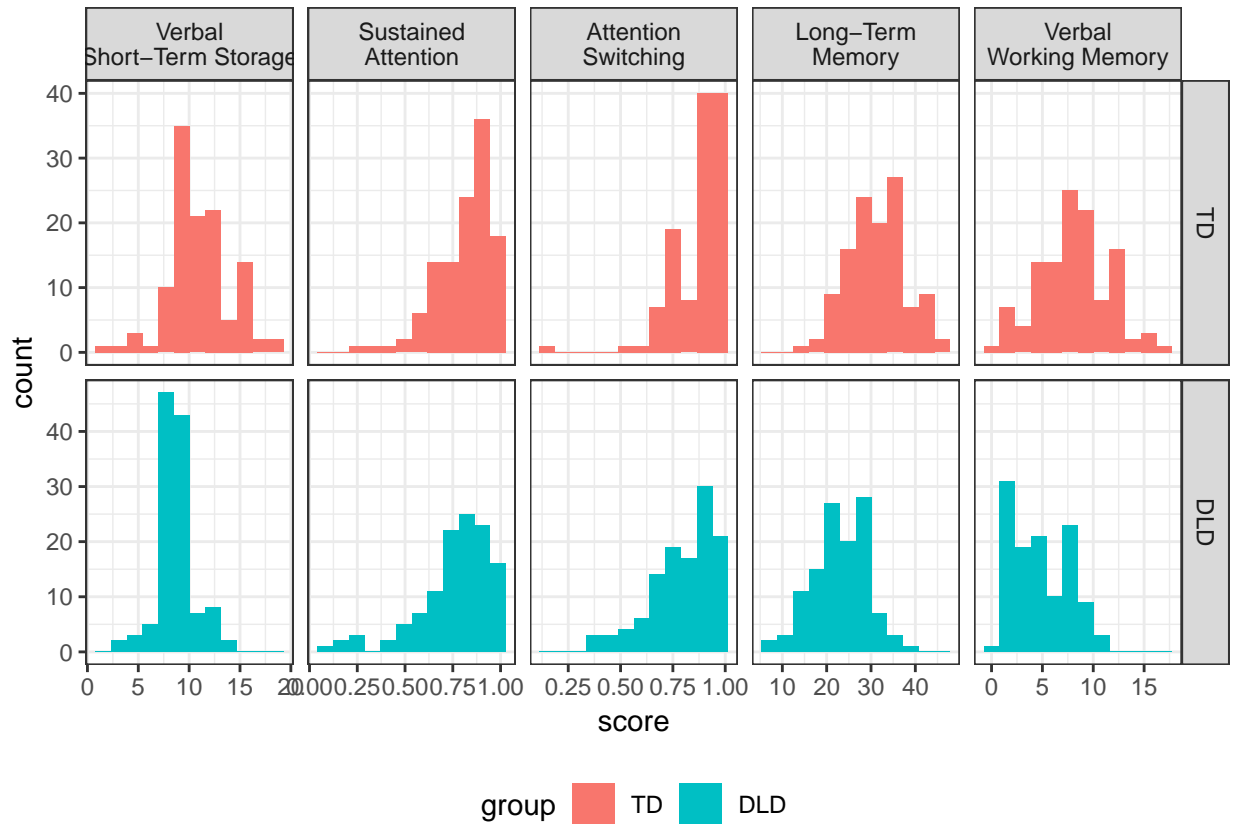

Figure 1: Univariate Distribution of Each Measure, within Each Group, Histograms



```
data_superlong %>%
  ggplot(aes(score,
              fill = group)) +
  geom_density(alpha = .5) +
  theme_bw() +
  facet_wrap(. ~ measure, scale = "free", nrow = 1) +
  theme(legend.position = "bottom")
```

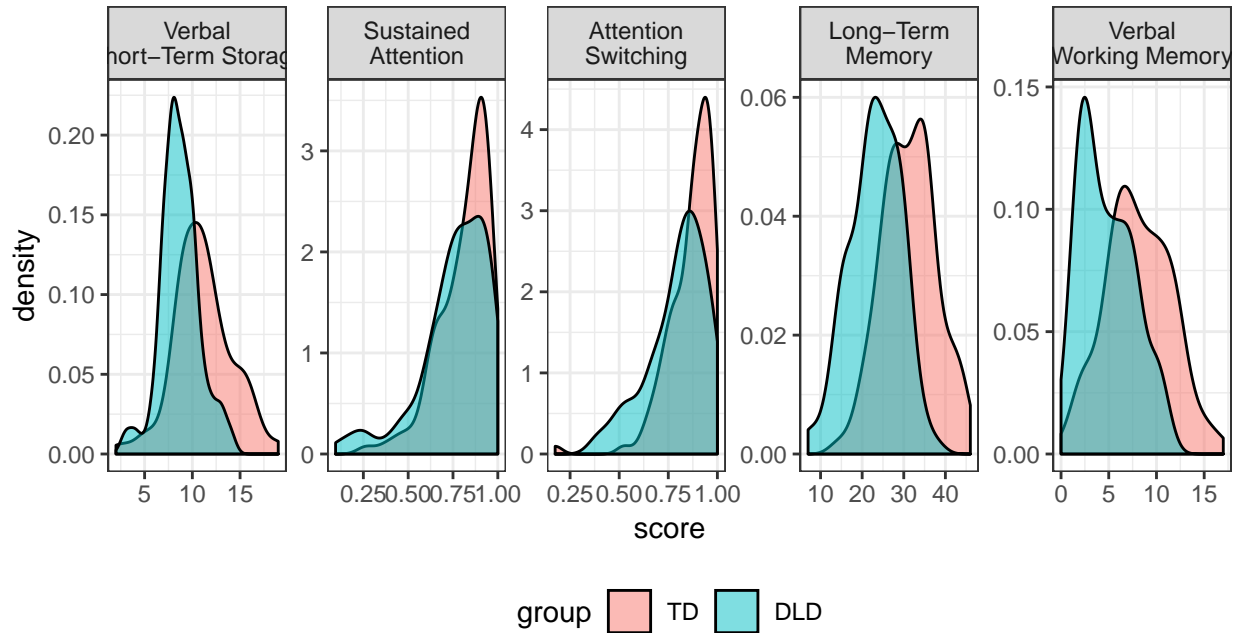

Figure 2: Univariate Distribution of Each Measure, within Each Group, Density Plots

```
data_superlong %>%
  ggplot(aes(y = score,
             x = group,
             fill = group)) +
  geom_boxplot() +
  stat_summary(color = "white") +
  theme_bw() +
  facet_wrap(. ~ measure, scale = "free", nrow = 1) +
  theme(legend.position = "bottom") +
  labs(x = NULL,
       y = NULL)
```

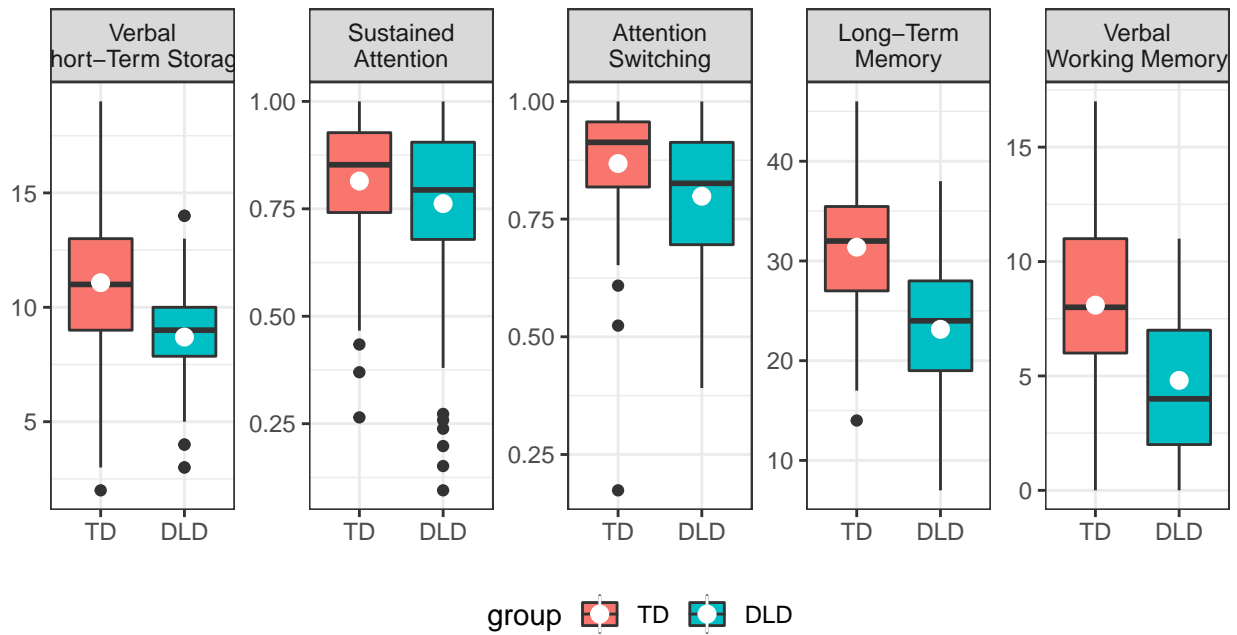

Figure 3: Univariate Distribution of Each Measure, within Each Group, Side-by-Side Boxplots

### 2.2.3 Bivariate Associations

```
data_model %>%  
  data.frame %>%  
  GGally::ggscatmat(columns = 3:7,  
                    color = "group") +  
  theme_bw() +  
  theme(legend.position = "bottom") +  
  labs(x = NULL,  
       y = NULL,  
       color = "Group: ")
```

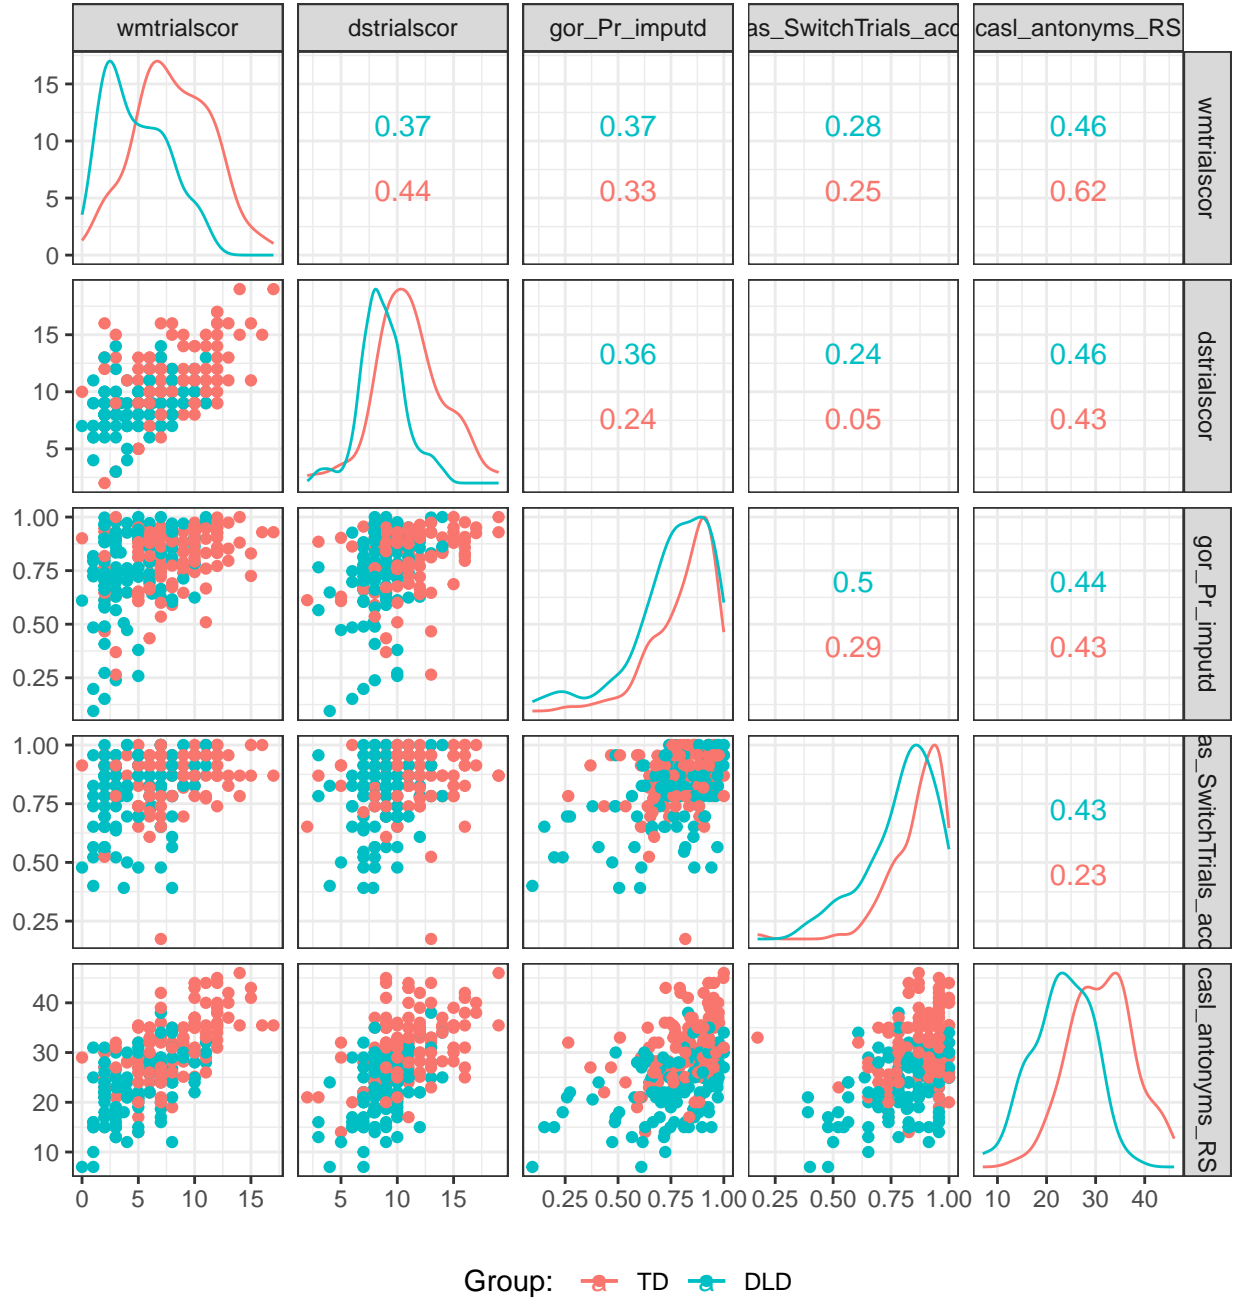

Figure 4: Bivariate Correlation Between All Pairs of Measures, by Group

```
data_long %>%
  ggplot(aes(x = score,
             y = wmttrialscor)) +
  geom_count() +
  geom_smooth(method = "lm",
             se = FALSE) +
  theme_bw() +
  facet_grid(group ~ measure, scale = "free") +
  theme(legend.position = "bottom") +
  labs(x = NULL,
       y = "Working Memory Capacity")
```

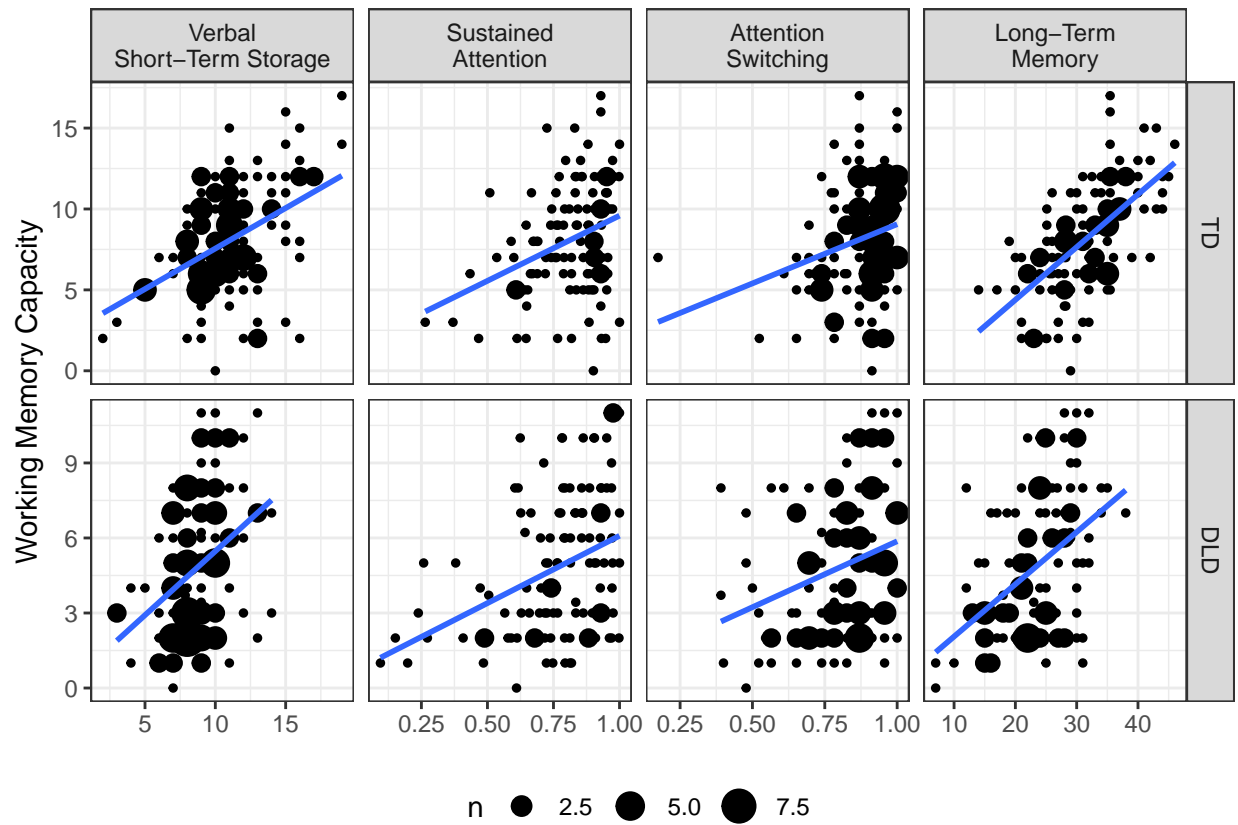

Figure 5: Eight Independent Simple Linear Regression Between Each Predictor and Verbal Working Memory, by Group

```
data_long %>%
  ggplot(aes(x = score,
             y = wmttrialscor,
             color = group,
             fill = group)) +
  geom_smooth(method = "lm") +
  theme_bw() +
  facet_wrap(. ~ measure, scale = "free", nrow = 1) +
  theme(legend.position = "bottom") +
  labs(x = NULL,
       y = "Working Memory Capacity")
```

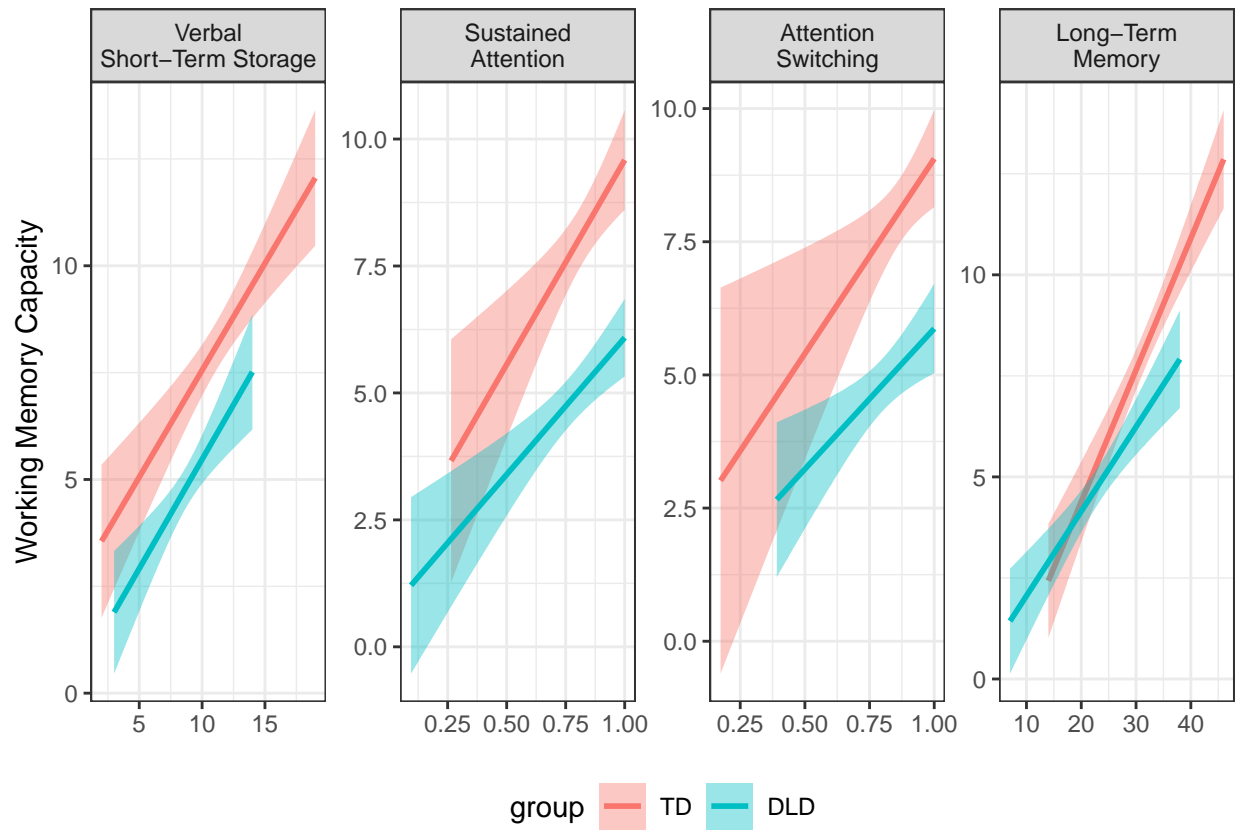

Figure 6: Eight Independent Simple Linear Regressions Between Each Predictor and Verbal Working Memory

## 3 GLM - TD: Typically Developing Group

### 3.1 Fit Nested Models

```
fit_lm_td_0 <- data_model %>%
  dplyr::filter(group == "TD") %>%
  lm(scale(wmtrialscor) ~ 1,
     data = .)

fit_lm_td_1 <- data_model %>%
  dplyr::filter(group == "TD") %>%
  lm(scale(wmtrialscor) ~ scale(dstrialscor),
     data = .)

fit_lm_td_2 <- data_model %>%
  dplyr::filter(group == "TD") %>%
  lm(scale(wmtrialscor) ~ scale(dstrialscor) +
     scale(gor_Pr_imputd),
     data = .)

fit_lm_td_3 <- data_model %>%
  dplyr::filter(group == "TD") %>%
  lm(scale(wmtrialscor) ~ scale(dstrialscor) +
     scale(gor_Pr_imputd) +
     scale(as_SwitchTrials_acc),
     data = .)

fit_lm_td_4 <- data_model %>%
  dplyr::filter(group == "TD") %>%
  lm(scale(wmtrialscor) ~ scale(dstrialscor) +
     scale(gor_Pr_imputd) +
     scale(as_SwitchTrials_acc) +
     scale(casl_antonyms_RS),
     data = .)
```

## 3.2 Parameter Estimates

```
texreg::texreg(list(fit_lm_td_1,
                    fit_lm_td_2,
                    fit_lm_td_3,
                    fit_lm_td_4),
               custom.model.names = c("Storage",
                                      "and SA",
                                      "and AS",
                                      "and LTM"),
               custom.coef.map = list("scale(dstrialscor)"      = "Verbal Short-Term Storage",
                                      "scale(gor_Pr_imputd)"     = "Sustained Attention",
                                      "scale(as_SwitchTrials_acc)" = "Attention Switching",
                                      "scale(casl_antonyms_RS)"  = "Long-Term Memory"),
               bold = 0.05,
               digits = 3,
               single.row = TRUE,
               include.fstatistic = TRUE,
               float.pos = "hb",
               caption.above = TRUE,
               caption = "GLM Parameter Estimates: Typically Developing Group. Estimates are standardized betas.")
```

Table 2: GLM Parameter Estimates: Typically Developing Group. Estimates are standardized betas.

|                           | Storage                 | and SA                  | and AS                  | and LTM                 |
|---------------------------|-------------------------|-------------------------|-------------------------|-------------------------|
| Verbal Short-Term Storage | <b>0.442</b> (0.084)*** | <b>0.384</b> (0.084)*** | <b>0.388</b> (0.082)*** | <b>0.218</b> (0.079)**  |
| Sustained Attention       |                         | <b>0.239</b> (0.084)**  | <b>0.185</b> (0.086)*   | 0.037 (0.081)           |
| Attention Switching       |                         |                         | <b>0.181</b> (0.083)*   | 0.121 (0.075)           |
| Long-Term Memory          |                         |                         |                         | <b>0.482</b> (0.085)*** |
| R <sup>2</sup>            | 0.196                   | 0.249                   | 0.279                   | 0.439                   |
| Adj. R <sup>2</sup>       | 0.189                   | 0.236                   | 0.260                   | 0.419                   |
| Num. obs.                 | 117                     | 117                     | 117                     | 117                     |
| F statistic               | 27.995                  | 18.937                  | 14.599                  | 21.904                  |
| RMSE                      | 0.901                   | 0.874                   | 0.860                   | 0.762                   |

\*\*\*  $p < 0.001$ , \*\*  $p < 0.01$ , \*  $p < 0.05$



### 3.3 Comparisons of Nested Model

```
lmSupport::modelCompare(fit_lm_td_1, fit_lm_td_2)
```

```
SSE (Compact) = 93.28973  
SSE (Augmented) = 87.07268  
Delta R-Squared = 0.05359529  
Partial Eta-Squared (PRE) = 0.06664242  
F(1,114) = 8.139684, p = 0.005144251
```

```
lmSupport::modelCompare(fit_lm_td_2, fit_lm_td_3)
```

```
SSE (Compact) = 87.07268  
SSE (Augmented) = 83.59917  
Delta R-Squared = 0.02994407  
Partial Eta-Squared (PRE) = 0.0398921  
F(1,113) = 4.695105, p = 0.03234825
```

```
lmSupport::modelCompare(fit_lm_td_3, fit_lm_td_4)
```

```
SSE (Compact) = 83.59917  
SSE (Augmented) = 65.08505  
Delta R-Squared = 0.1596045  
Partial Eta-Squared (PRE) = 0.2214629  
F(1,112) = 31.85956, p = 1.267204e-07
```

### 3.4 Partial Correlations

```
rsq::pcor(fit_lm_td_1, fit_lm_td_0)$partial.cor
```

```
[1] 0.4424682
```

```
rsq::pcor(fit_lm_td_2, fit_lm_td_1)$partial.cor
```

```
[1] 0.2581519
```

```
rsq::pcor(fit_lm_td_3, fit_lm_td_2)$partial.cor
```

```
[1] 0.1997301
```

```
rsq::pcor(fit_lm_td_4, fit_lm_td_3)$partial.cor
```

```
[1] 0.4705985
```

## 4 GLM - DLD: Developmental Language Disorder Group

### 4.1 Fit Nested Models

```
fit_lm_dld_0 <- data_model %>%  
  dplyr::filter(group == "DLD") %>%  
  lm(scale(wmtrialscor) ~ 1,  
     data = .)  
  
fit_lm_dld_1 <- data_model %>%  
  dplyr::filter(group == "DLD") %>%  
  lm(scale(wmtrialscor) ~ scale(dstrialscor),  
     data = .)  
  
fit_lm_dld_2 <- data_model %>%  
  dplyr::filter(group == "DLD") %>%  
  lm(scale(wmtrialscor) ~ scale(dstrialscor) +  
                                scale(gor_Pr_imputd),  
     data = .)  
  
fit_lm_dld_3 <- data_model %>%  
  dplyr::filter(group == "DLD") %>%  
  lm(scale(wmtrialscor) ~ scale(dstrialscor) +  
                                scale(gor_Pr_imputd) +  
                                scale(as_SwitchTrials_acc),  
     data = .)  
  
fit_lm_dld_4 <- data_model %>%  
  dplyr::filter(group == "DLD") %>%  
  lm(scale(wmtrialscor) ~ scale(dstrialscor) +  
                                scale(gor_Pr_imputd) +  
                                scale(as_SwitchTrials_acc) +  
                                scale(casl_antonyms_RS),  
     data = .)
```

## 4.2 Parameter Estimates

```
texreg::texreg(list(fit_lm_dld_1,
                    fit_lm_dld_2,
                    fit_lm_dld_3,
                    fit_lm_dld_4),
               custom.model.names = c("Storage",
                                      "and SA",
                                      "and AS",
                                      "and LTM"),
               custom.coef.map = list("scale(dstrialscor)"      = "Verbal Short-Term Storage",
                                      "scale(gor_Pr_imputd)"    = "Sustained Attention",
                                      "scale(as_SwitchTrials_acc)" = "Attention Switching",
                                      "scale(casl_antonyms_RS)"  = "Long-Term Memory"),
               bold = 0.05,
               digits = 3,
               single.row = TRUE,
               include.fstatistic = TRUE,
               float.pos = "hb",
               caption.above = TRUE,
               caption = "GLM Parameter Estimates: Developmental Language Disorder Group. Estimates are
```

Table 3: GLM Parameter Estimates: Developmental Language Disorder Group. Estimates are standardized betas.

|                           | Storage                 | and SA                 | and AS                 | and LTM                |
|---------------------------|-------------------------|------------------------|------------------------|------------------------|
| Verbal Short-Term Storage | <b>0.370</b> (0.087)*** | <b>0.272</b> (0.090)** | <b>0.265</b> (0.090)** | 0.169 (0.093)          |
| Sustained Attention       |                         | <b>0.272</b> (0.090)** | <b>0.222</b> (0.101)*  | 0.164 (0.100)          |
| Attention Switching       |                         |                        | 0.104 (0.097)          | 0.030 (0.097)          |
| Long-Term Memory          |                         |                        |                        | <b>0.293</b> (0.100)** |
| R <sup>2</sup>            | 0.137                   | 0.201                  | 0.209                  | 0.265                  |
| Adj. R <sup>2</sup>       | 0.129                   | 0.187                  | 0.188                  | 0.239                  |
| Num. obs.                 | 117                     | 117                    | 117                    | 117                    |
| F statistic               | 18.191                  | 14.357                 | 9.966                  | 10.097                 |
| RMSE                      | 0.933                   | 0.902                  | 0.901                  | 0.872                  |

\*\*\* $p < 0.001$ , \*\* $p < 0.01$ , \* $p < 0.05$

### 4.3 Comparisons of Nested Model

```
lmSupport::modelCompare(fit_lm_dld_1, fit_lm_dld_2)
```

```
SSE (Compact) = 100.1571  
SSE (Augmented) = 92.66122  
Delta R-Squared = 0.0646201  
Partial Eta-Squared (PRE) = 0.0748417  
F(1,114) = 9.222156, p = 0.002963913
```

```
lmSupport::modelCompare(fit_lm_dld_2, fit_lm_dld_3)
```

```
SSE (Compact) = 92.66122  
SSE (Augmented) = 91.73044  
Delta R-Squared = 0.008023942  
Partial Eta-Squared (PRE) = 0.01004495  
F(1,113) = 1.146597, p = 0.2865445
```

```
lmSupport::modelCompare(fit_lm_dld_3, fit_lm_dld_4)
```

```
SSE (Compact) = 91.73044  
SSE (Augmented) = 85.25605  
Delta R-Squared = 0.05581368  
Partial Eta-Squared (PRE) = 0.07058058  
F(1,112) = 8.505336, p = 0.00427874
```

### 4.4 Partial Correlations

```
rsq::pcor(fit_lm_dld_1, fit_lm_dld_0)$partial.cor
```

```
[1] 0.3695623
```

```
rsq::pcor(fit_lm_dld_2, fit_lm_dld_1)$partial.cor
```

```
[1] 0.2735721
```

```
rsq::pcor(fit_lm_dld_3, fit_lm_dld_2)$partial.cor
```

```
[1] 0.1002245
```

```
rsq::pcor(fit_lm_dld_4, fit_lm_dld_3)$partial.cor
```

```
[1] 0.2656701
```

## 5 GLM - Full Sample

### 5.1 Fit Nested Models - a single two-way interaction

```
fit_lm_all_main <- data_model %>%
  lm(wmtrialscor ~ dstrialscor +
      gor_Pr_imputd +
      as_SwitchTrials_acc +
      casl_antonyms_RS +
      group,
      data = .)

fit_lm_all_1 <- data_model %>%
  lm(wmtrialscor ~ dstrialscor +
      gor_Pr_imputd +
      as_SwitchTrials_acc +
      casl_antonyms_RS +
      dstrialscor*group,
      data = .)

fit_lm_all_2 <- data_model %>%
  lm(wmtrialscor ~ dstrialscor +
      gor_Pr_imputd +
      as_SwitchTrials_acc +
      casl_antonyms_RS +
      gor_Pr_imputd*group,
      data = .)

fit_lm_all_3 <- data_model %>%
  lm(wmtrialscor ~ dstrialscor +
      gor_Pr_imputd +
      as_SwitchTrials_acc +
      casl_antonyms_RS +
      as_SwitchTrials_acc*group,
      data = .)

fit_lm_all_4 <- data_model %>%
  lm(wmtrialscor ~ dstrialscor +
      gor_Pr_imputd +
      as_SwitchTrials_acc +
      casl_antonyms_RS +
      casl_antonyms_RS*group,
      data = .)

fit_lm_all_14 <- data_model %>%
  lm(wmtrialscor ~ dstrialscor +
      gor_Pr_imputd +
      as_SwitchTrials_acc +
      casl_antonyms_RS +
      dstrialscor*group +
      casl_antonyms_RS*group,
      data = .)
```

```

fit_lm_all_24 <- data_model %>%
  lm(wmtrialscor ~ dstrialscor +
      gor_Pr_imputd +
      as_SwitchTrials_acc +
      casl_antonyms_RS +
      gor_Pr_imputd*group +
      casl_antonyms_RS*group,
    data = .)

fit_lm_all_34 <- data_model %>%
  lm(wmtrialscor ~ dstrialscor +
      gor_Pr_imputd +
      as_SwitchTrials_acc +
      casl_antonyms_RS +
      as_SwitchTrials_acc*group +
      casl_antonyms_RS*group,
    data = .)

```

## 5.2 Parameter Estimates

```
texreg::texreg(list(fit_lm_all_1,
                    fit_lm_all_2,
                    fit_lm_all_3,
                    fit_lm_all_4),
               custom.model.names = c("Storage",
                                      "or SA",
                                      "or AS",
                                      "or LTM"),
               custom.coef.map = list("dstrialscor"           = "Verbal Short Term Storage",
                                      "gor_Pr_imputd"         = "Sustained Attention (SA)",
                                      "as_SwitchTrials_acc"   = "Attention Switching (AS)",
                                      "casl_antonyms_RS"      = "Long Term Memory (LTM)",
                                      "groupDLD"             = "DLD group",
                                      "dstrialscor:groupDLD"  = "DLD x Storage",
                                      "gor_Pr_imputd:groupDLD" = "DLD x SA",
                                      "as_SwitchTrials_acc:groupDLD" = "DLD x AS",
                                      "casl_antonyms_RS:groupDLD" = "DLD x LTM"),
               groups = list("Main Effects" = 1:5,
                             "Interactions with Group" = 6:9),
               bold = 0.05,
               digits = 3,
               single.row = TRUE,
               include.fstatistic = TRUE,
               float.pos = "hb",
               caption.above = TRUE,
               caption = "GLM Parameter Estimates: Include a Single Two-way Interction with Group, Estimates are unstandardized betas.")
```

Table 4: GLM Parameter Estimates: Include a Single Two-way Interction with Group, Estimates are unstandardized betas.

|                           | Storage                 | or SA                   | or AS                   | or LTM                  |
|---------------------------|-------------------------|-------------------------|-------------------------|-------------------------|
| Main Effects              |                         |                         |                         |                         |
| Verbal Short Term Storage | <b>0.292</b> (0.083)*** | <b>0.251</b> (0.073)*** | <b>0.254</b> (0.072)*** | <b>0.240</b> (0.072)**  |
| Sustained Attention (SA)  | 1.677 (1.178)           | 2.468 (1.794)           | 1.768 (1.175)           | 1.703 (1.161)           |
| Attention Switching (AS)  | 1.608 (1.403)           | 1.612 (1.410)           | 3.881 (2.034)           | 1.924 (1.397)           |
| Long Term Memory (LTM)    | <b>0.198</b> (0.032)*** | <b>0.196</b> (0.032)*** | <b>0.198</b> (0.032)*** | <b>0.254</b> (0.040)*** |
| DLD group                 | 0.482 (1.417)           | 0.246 (1.704)           | 2.588 (2.197)           | 2.488 (1.488)           |
| Interactions with Group   |                         |                         |                         |                         |
| DLD x Storage             | -0.143 (0.143)          |                         |                         |                         |
| DLD x SA                  |                         | -1.421 (2.097)          |                         |                         |
| DLD x AS                  |                         |                         | -4.108 (2.561)          |                         |
| DLD x LTM                 |                         |                         |                         | <b>-0.125</b> (0.053)*  |
| R <sup>2</sup>            | 0.494                   | 0.493                   | 0.498                   | 0.504                   |
| Adj. R <sup>2</sup>       | 0.481                   | 0.480                   | 0.485                   | 0.491                   |
| Num. obs.                 | 234                     | 234                     | 234                     | 234                     |
| F statistic               | 37.010                  | 36.832                  | 37.526                  | 38.492                  |
| RMSE                      | 2.539                   | 2.542                   | 2.530                   | 2.514                   |

\*\*\* $p < 0.001$ , \*\* $p < 0.01$ , \* $p < 0.05$

```

texreg::texreg(list(fit_lm_all_4,
                    fit_lm_all_14,
                    fit_lm_all_24,
                    fit_lm_all_34),
               custom.model.names = c("only LTM",
                                      "with Storage",
                                      "with SA",
                                      "with AS"),
               custom.coef.map = list("dstrialscor"           = "Verbal Short Term Storage",
                                      "gor_Pr_imputd"         = "Sustained Attention (SA)",
                                      "as_SwitchTrials_acc"    = "Attention Switching (AS)",
                                      "casl_antonyms_RS"       = "Long Term Memory (LTM)",
                                      "groupDLD"              = "DLD group",
                                      "dstrialscor:groupDLD"    = "DLD x Storage",
                                      "gor_Pr_imputd:groupDLD"  = "DLD x SA",
                                      "as_SwitchTrials_acc:groupDLD" = "DLD x AS",
                                      "casl_antonyms_RS:groupDLD" = "DLD x LTM"),
               groups = list("Main Effects" = 1:5,
                             "Interactions with Group" = 6:9),
               bold = 0.05,
               digits = 3,
               single.row = TRUE,
               include.fstatistic = TRUE,
               float.pos = "hb",
               caption.above = TRUE,
               caption = "GLM Parameter Estimates: Include a Second Two-way Interction with Group. Estim

```

Table 5: GLM Parameter Estimates: Include a Second Two-way Interction with Group. Estimates are unstandardized betas.

|                           | only LTM                | with Storage            | with SA                 | with AS                 |
|---------------------------|-------------------------|-------------------------|-------------------------|-------------------------|
| Main Effects              |                         |                         |                         |                         |
| Verbal Short Term Storage | <b>0.240</b> (0.072)**  | <b>0.240</b> (0.086)**  | <b>0.240</b> (0.072)**  | <b>0.243</b> (0.072)*** |
| Sustained Attention (SA)  | 1.703 (1.161)           | 1.702 (1.169)           | 1.220 (1.861)           | 1.812 (1.168)           |
| Attention Switching (AS)  | 1.924 (1.397)           | 1.924 (1.401)           | 1.895 (1.403)           | 3.266 (2.047)           |
| Long Term Memory (LTM)    | <b>0.254</b> (0.040)*** | <b>0.254</b> (0.041)*** | <b>0.258</b> (0.042)*** | <b>0.246</b> (0.041)*** |
| DLD group                 | 2.488 (1.488)           | 2.482 (1.695)           | 2.108 (1.878)           | 4.082 (2.318)           |
| Interactions with Group   |                         |                         |                         |                         |
| DLD x Storage             |                         | 0.001 (0.157)           |                         |                         |
| DLD x SA                  |                         |                         | 0.762 (2.290)           |                         |
| DLD x AS                  |                         |                         |                         | -2.416 (2.693)          |
| DLD x LTM                 | <b>-0.125</b> (0.053)*  | <b>-0.125</b> (0.059)*  | <b>-0.133</b> (0.059)*  | -0.109 (0.056)          |
| R <sup>2</sup>            | 0.504                   | 0.504                   | 0.505                   | 0.506                   |
| Adj. R <sup>2</sup>       | 0.491                   | 0.489                   | 0.489                   | 0.491                   |
| Num. obs.                 | 234                     | 234                     | 234                     | 234                     |
| F statistic               | 38.492                  | 32.848                  | 32.880                  | 33.080                  |
| RMSE                      | 2.514                   | 2.520                   | 2.519                   | 2.515                   |

\*\*\* $p < 0.001$ , \*\* $p < 0.01$ , \* $p < 0.05$

The three-way was not significant.



### 5.2.1 Simple Slopes

```
simple_slopes(fit_lm_all_4,
  levels = list(group = c("TD", "DLD", 'sstest'),
    casl_antonyms_RS = c(mean(data_model$casl_antonyms_RS), 'sstest')))
```

|   | casl_antonyms_RS | group  | Test | Estimate | Std. Error | t value | df  | Pr(> t )  |
|---|------------------|--------|------|----------|------------|---------|-----|-----------|
| 1 | sstest           | TD     |      | 0.2535   | 0.0397     | 6.3836  | 227 | 9.635e-10 |
| 2 | sstest           | DLD    |      | 0.1285   | 0.0433     | 2.9697  | 227 | 0.003301  |
| 3 | 27.2630341880342 | sstest |      | -0.9209  | 0.4038     | -2.2808 | 227 | 0.023488  |

Sig.

|   |     |
|---|-----|
| 1 | *** |
| 2 | **  |
| 3 | *   |

### 5.3 Interpretation

```
summary(fit_lm_all_4)
```

Call:

```
lm(formula = wmtrialscor ~ dstrialscor + gor_Pr_imputd + as_SwitchTrials_acc +
  casl_antonyms_RS + casl_antonyms_RS * group, data = .)
```

Residuals:

|  | Min     | 1Q      | Median | 3Q     | Max    |
|--|---------|---------|--------|--------|--------|
|  | -7.4659 | -1.6399 | 0.1598 | 1.7384 | 5.7707 |

Coefficients:

|                           | Estimate | Std. Error | t value | Pr(> t )     |
|---------------------------|----------|------------|---------|--------------|
| (Intercept)               | -5.57927 | 1.56355    | -3.568  | 0.000438 *** |
| dstrialscor               | 0.24011  | 0.07219    | 3.326   | 0.001027 **  |
| gor_Pr_imputd             | 1.70287  | 1.16145    | 1.466   | 0.143990     |
| as_SwitchTrials_acc       | 1.92447  | 1.39745    | 1.377   | 0.169829     |
| casl_antonyms_RS          | 0.25354  | 0.03972    | 6.384   | 9.63e-10 *** |
| groupDLD                  | 2.48754  | 1.48789    | 1.672   | 0.095931 .   |
| casl_antonyms_RS:groupDLD | -0.12502 | 0.05324    | -2.348  | 0.019713 *   |

---

Signif. codes: 0 '\*\*\*' 0.001 '\*\*' 0.01 '\*' 0.05 '.' 0.1 ' ' 1

Residual standard error: 2.514 on 227 degrees of freedom

Multiple R-squared: 0.5043, Adjusted R-squared: 0.4912

F-statistic: 38.49 on 6 and 227 DF, p-value: < 2.2e-16

- In the TD group, for each point higher children are on LTM (holding all other covariates constant) there mean vWM is 0.25 higher.
- Conversely in the DLD group, a similar point higher in LTM is associated with only 0.13 higher on vWM.
- The difference in slopes/associations is statistically significant,  $\beta_{interaction} = -0.125$ ,  $p = .020$ .

### 5.3.1 Visualization

```
data_model %>%
  dplyr::group_by(group) %>%
  dplyr::summarise(min = min(casl_antonyms_RS),
                   mean = mean(casl_antonyms_RS),
                   max = max(casl_antonyms_RS)) %>%
  pander::pander(caption = "Extremes of Long Term Memory Scores, by Group")
```

Table 6: Extremes of Long Term Memory Scores, by Group

| group | min | mean  | max |
|-------|-----|-------|-----|
| TD    | 14  | 31.38 | 46  |
| DLD   | 7   | 23.15 | 38  |

```
effects::Effect(focal.predictors = c("group", "casl_antonyms_RS"),
               mod = fit_lm_all_4,
               xlevels = list(casl_antonyms_RS = seq(from = 7,
                                                       to = 46,
                                                       by = 1))) %>%

data.frame() %>%
dplyr::filter((group == "TD" & 14 <= casl_antonyms_RS & casl_antonyms_RS <= 46) |
              (group == "DLD" & 7 <= casl_antonyms_RS & casl_antonyms_RS <= 38)) %>%
ggplot(aes(x = casl_antonyms_RS,
           y = fit,
           linetype = group %>% fct_rev(),
           fill = group %>% fct_rev())) +
geom_ribbon(aes(ymin = lower,
               ymax = upper),
           alpha = .25) +
geom_line() +
theme_bw() +
scale_linetype_manual(values = c("solid", "longdash")) +
scale_fill_manual(values = c("gray60", "gray30")) +
theme(legend.background = element_rect(color = "black"),
      legend.position = c(0, 1),
      legend.justification = c(-0.1, 1.1),
      legend.key.width = unit(1.5, "cm")) +
labs(x = "Long Term Memory (LTM)",
     y = "Verbal Working Memory (vWM)",
     fill = "Group: ",
     linetype = "Group: ")

ggsave(filename = "DLD_interaction_plot_SS_5-1-19.png",
       height = 4,
       width = 6,
       units = "in")
```

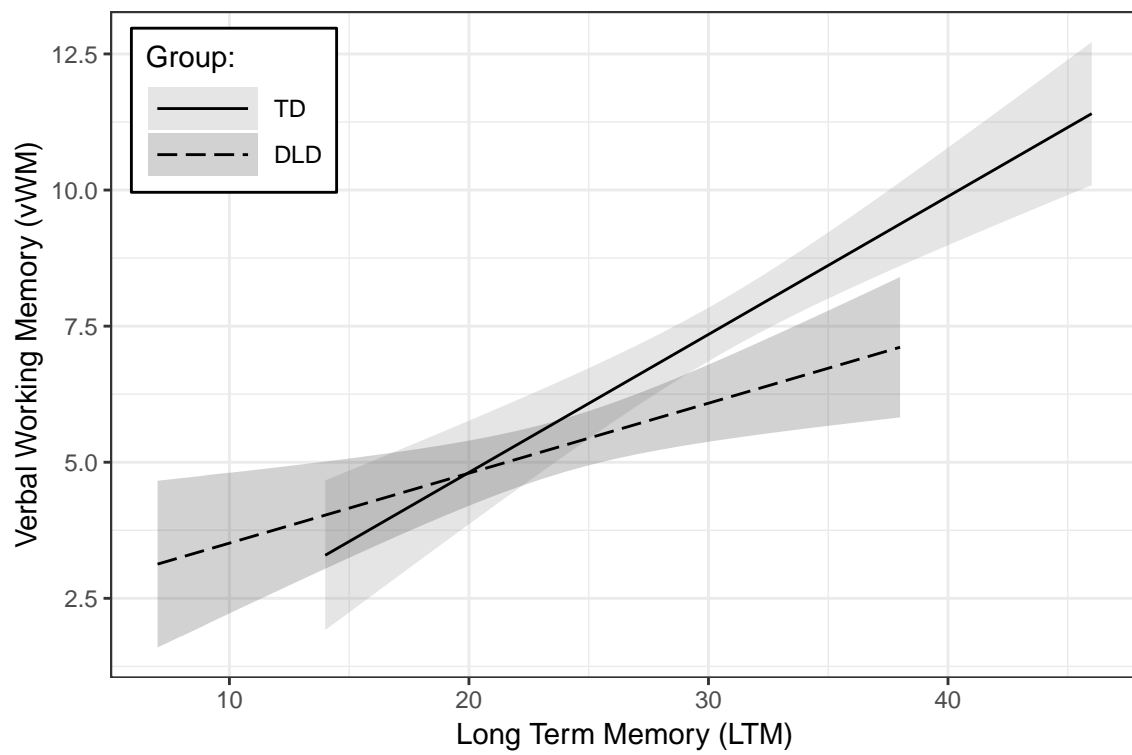

Figure 7: GLM Interaction Plot. Error bands display 95 percent confidence interval for the mean.
