# Supplementary material
Source: publisher figshare collection journal article supplement (https://asha.figshare.com/articles/dataset/_/9932312)
Supplement: Supplementary file 3 [file 1]

**Supplemental Material S1.** Correlations among verbal working memory capacity (vWM), verbal storage, sustained attention (SA), attention switching (AS), lexical long-term memory (LTM), and age (in months) in the typically developing children.

---

|         | vWM | Storage            | SA                 | AS                 | LTM                | Age                |
|---------|-----|--------------------|--------------------|--------------------|--------------------|--------------------|
| vWM     |     | .44 <sup>***</sup> | .33 <sup>***</sup> | .26 <sup>**</sup>  | .62 <sup>***</sup> | .48 <sup>***</sup> |
| Storage |     |                    | .25 <sup>**</sup>  | .10                | .43 <sup>***</sup> | .27 <sup>**</sup>  |
| SA      |     |                    |                    | .37 <sup>***</sup> | .43 <sup>***</sup> | .51 <sup>***</sup> |
| AS      |     |                    |                    |                    | .30 <sup>***</sup> | .37 <sup>***</sup> |
| LTM     |     |                    |                    |                    |                    | .73 <sup>***</sup> |

---

\* Significant at  $\alpha < .05$  (two-tailed)

\*\* Significant at  $\alpha < .01$  (two-tailed)

\*\*\* Significant at  $\alpha < .001$  (two-tailed)
